# Supplementary material for: Revealing speckle obscured living human retinal cells with artificial intelligence assisted adaptive optics optical coherence tomography
Source: PubMed Central journal article supplement (PMC11006674; doi:10.1038/s43856-024-00483-1), 2024-04-10
Supplement: 43856_2024_483_MOESM2_ESM.pdf [file 43856_2024_483_MOESM2_ESM.pdf]

1 **Description of Additional Supplementary Files**

2

3 **File Name:** Supplementary Data 1

4 **Description:** Numerical source data used to create Fig. 2 g-i, Fig. 3 j, and Fig. 5 in the  
5 manuscript.

6

7 **File Name:** Supplementary Movie 1

8 **Description: P-GAN recovers the retinal pigment epithelial (RPE) cells from**  
9 **speckled AO-OCT enface images.** Toggling between speckled and P-GAN recovered  
10 RPE image for participant S1 shows that P-GAN suppressed the noise and revealed the  
11 RPE cellular structure. Scale bar: 50  $\mu\text{m}$ .

12

13 **File Name:** Supplementary Movie 2

14 **Description: Comparison between P-GAN recovered RPE image and ground truth**  
15 **averaged RPE image.** Toggling between P-GAN recovered and averaged RPE images  
16 for participant S2 shows similarity in the cells. Scale bar: 50  $\mu\text{m}$ .

17

18 **File Name:** Supplementary Movie 3

19 **Description: Comparison of GAN recovered RPE images and ground truth**  
20 **averaged RPE images.** Video shows simultaneous visual comparison of the speckled  
21 RPE, GAN, Pix2Pix, CycleGAN, P-GAN recovered RPE, and averaged ground truth  
22 images for three participants (S1-S3). Scale bar: 50  $\mu\text{m}$ .

23
